# Supplementary material
Source: PubMed Central journal article supplement (PMC3904569)
Supplement: ASN.2013050473_ASN2013050473SupplementaryData.pdf [file ASN.2013050473_ASN2013050473SupplementaryData.pdf]

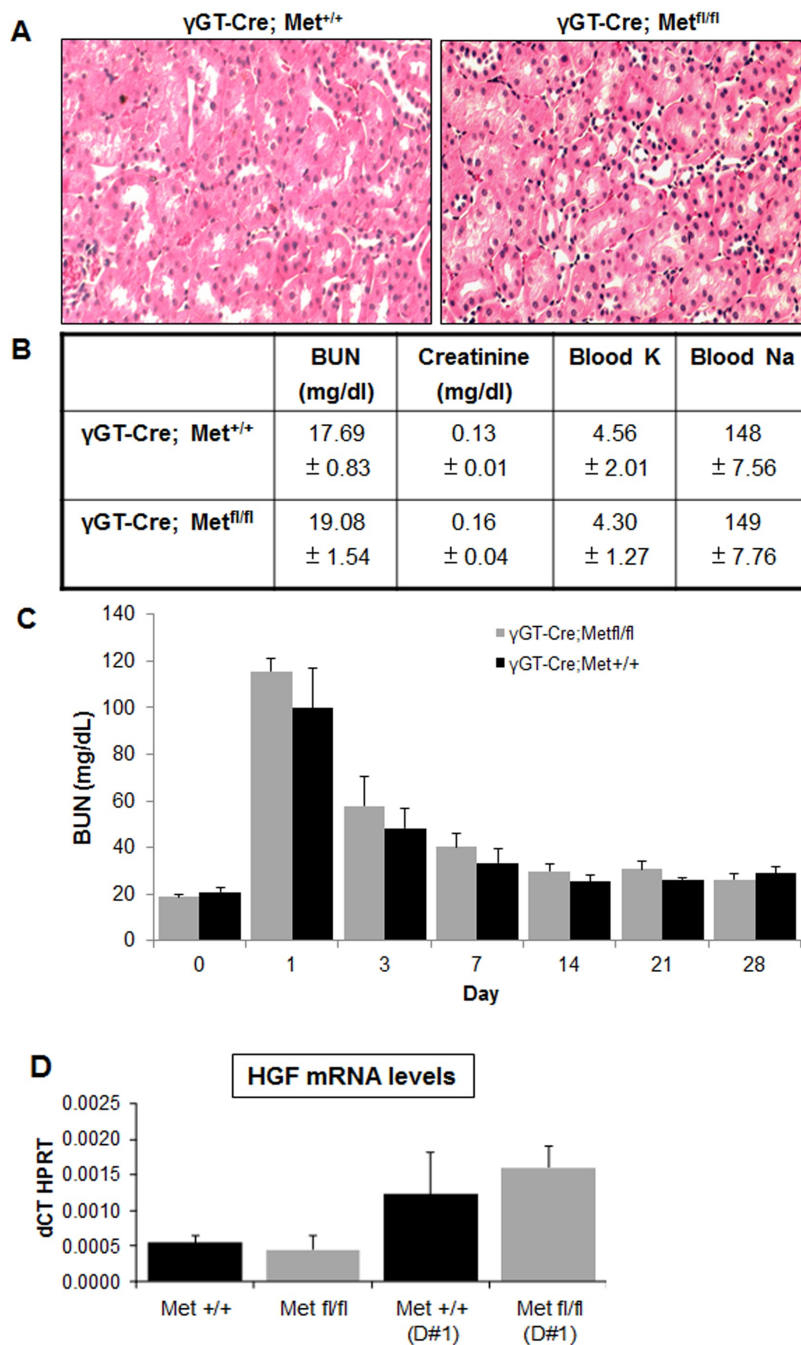

**Supplemental Figure.** (A,B) Histology and serum values of  $\gamma$ GT-Cre;Met<sup>fl/fl</sup> mice are similar to  $\gamma$ GT-Cre;Met<sup>+/+</sup> mice at baseline. (C) Blood urea nitrogen (BUN) values for the two groups at the indicated times following I/R. n=3 to 7 per group per time point. (D) HGF message by quantitative real-time PCR at baseline and day 1 after I/R in  $\gamma$ GT-Cre;Met<sup>fl/fl</sup> and  $\gamma$ GT-Cre;Met<sup>+/+</sup> mice.
